# Supplementary material for: Probing the interaction between cisplatin and the therapeutic monoclonal antibody trastuzumab
Source: Royal Society of Chemistry journal article supplement (doi:10.1039/c6ra04337b), 2016-01-01
Supplement: c6ra04337b1.pdf [file c6ra04337b1.pdf]

## **SUPPLEMENTARY ELECTRONIC INFORMATION for Probing the Interaction between Cisplatin and the Therapeutic Monoclonal Antibody Trastuzumab**

Alessia Lasorsa,<sup>a</sup> Maurizio Losacco,<sup>a</sup> Rosa Maria Iacobazzi,<sup>b,c</sup> Letizia Porcelli,<sup>c</sup> Amalia Azzariti,<sup>c</sup> Giovanni Natile,<sup>a</sup> and Fabio Arnesano<sup>a</sup>

<sup>a</sup>Department of Chemistry, University of Bari "Aldo Moro", via E. Orabona 4 70125 Bari, Italy.

<sup>b</sup>Department of Pharmacy-Drug Sciences, University of Bari "Aldo Moro", via E. Orabona 4 70125 Bari, Italy

<sup>c</sup>Istituto tumori IRCCS Giovanni Paolo II, viale O. Flacco 65 70124 Bari, Italy

### Contents

Fig. S1 SEC analysis of 100  $\mu$ M trastuzumab in ammonium acetate 20 mM at pH 6 (black contour), 100  $\mu$ M trastuzumab after 12 h digestion with papain at 25 °C (red contour) and 100  $\mu$ M trastuzumab after 2 h digestion with papain at 37 °C (blue contour).

Fig. S2 ESI-MS spectrum from  $m/z$  1000 to 2800 of Fc fragment comprising multiple charged states from +44 to +20 (A). Close-up of A across the range from  $m/z$  1520 to 1680, 4 distinctive peaks can be seen for each charged state.

Fig. S3 ESI-MS spectrum of Long Fab from  $m/z$  1000 to 2500 (A). Close-up of A across the range from  $m/z$  1380 to 1520 (B). ESI-MS spectrum of Long and Short Fab in 1:1 ratio from  $m/z$  1000 to 2500 (C). Close-up of C across the range from  $m/z$  1380 to 1520 (D).

Fig. S4 ESI-MS spectra from  $m/z$  1420 to 1520 of Long Fab incubated with cisplatin (1:20 ratio) for 12 h at 37 °C. Peaks of Long Fab-Pt(NH<sub>3</sub>)<sub>2</sub>Cl<sup>+</sup> adduct are shown in red.

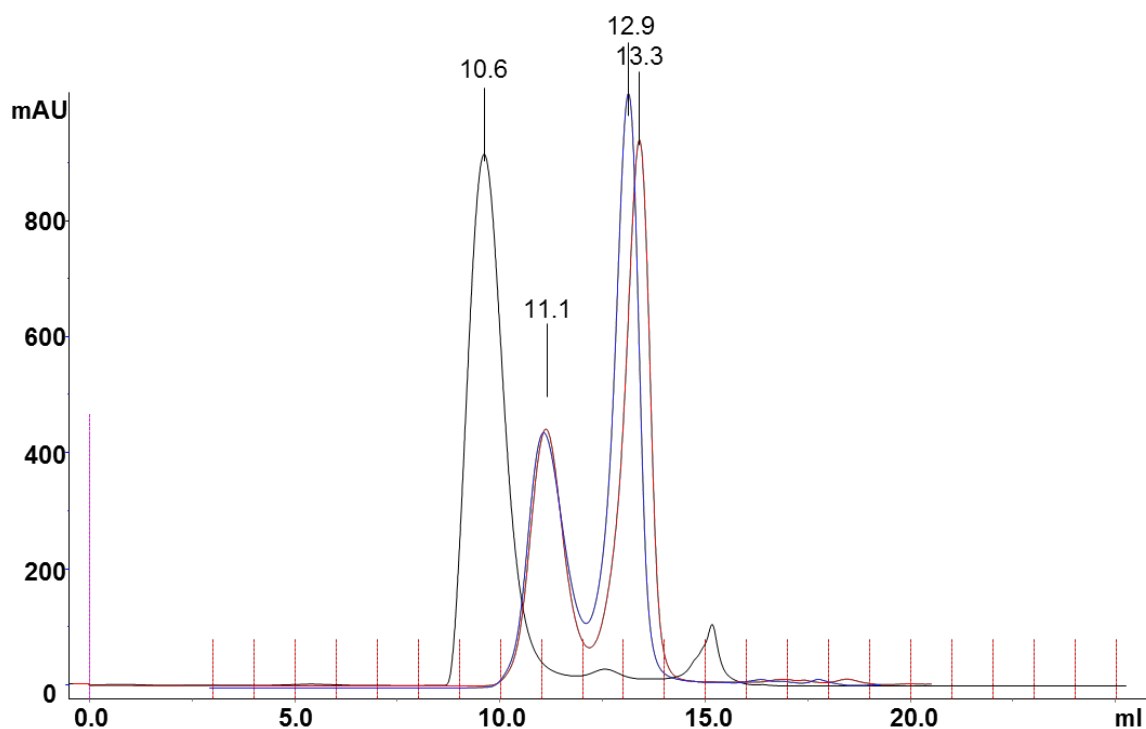

Fig. S1 SEC analysis of 100  $\mu$ M trastuzumab in ammonium acetate 20 mM at pH 6 (black contour), 100  $\mu$ M trastuzumab after 12 h digestion with papain at 25  $^{\circ}$ C (red contour) and 100  $\mu$ M trastuzumab after 2 h digestion with papain at 37  $^{\circ}$ C (blue contour).

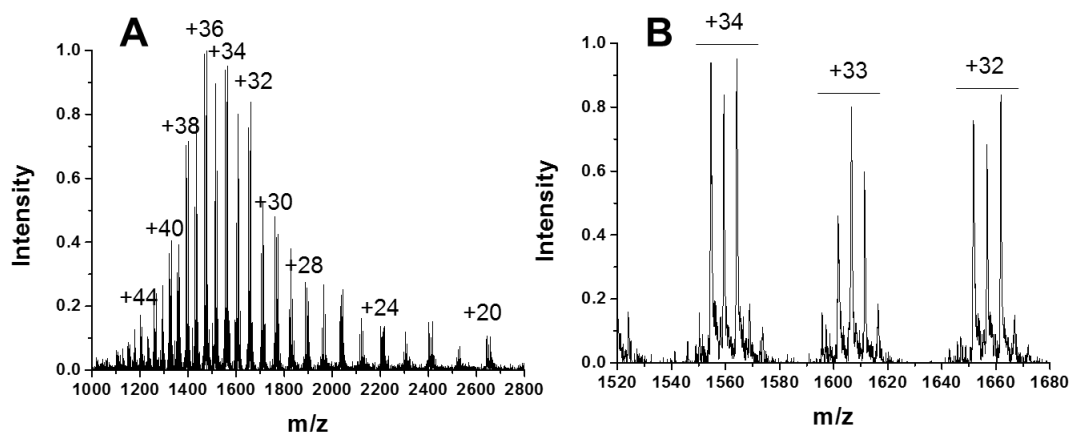

Fig. S2 ESI-MS spectrum from m/z 1000 to 2800 of Fc fragment comprising multiple charged states from +44 to +20 (A). Close-up of A across the range from m/z 1520 to 1680, 4 distinctive peaks can be seen for each charged state

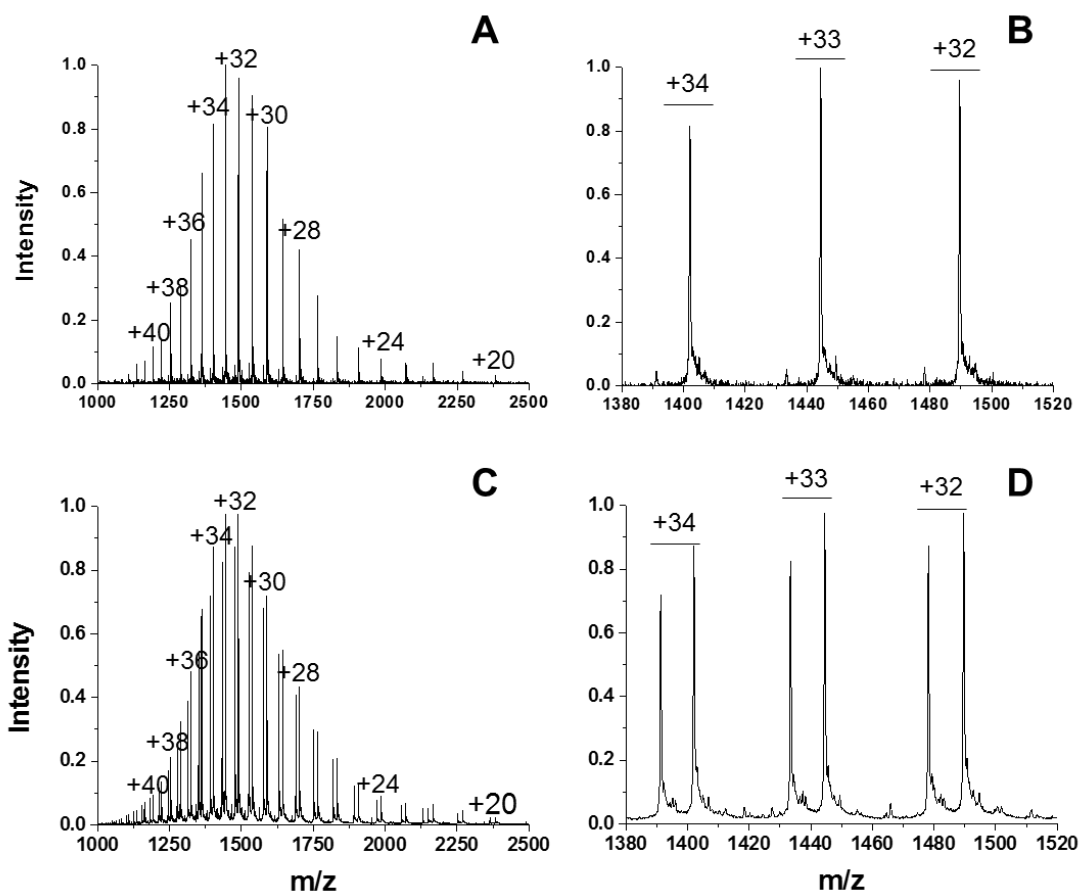

Fig. S3 Normalized ESI-MS spectrum of Long Fab from  $m/z$  1000 to 2500 (A). Close-up of A across the range from  $m/z$  1380 to 1520 (B). Normalized ESI-MS spectrum of Long and Short Fab in 1:1 ratio from  $m/z$  1000 to 2500 (C). Close-up of C across the range from  $m/z$  1380 to 1520 (D).

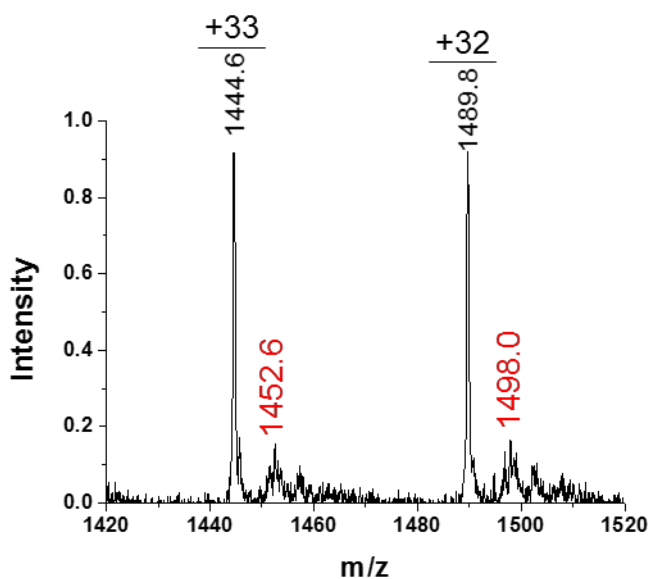

Fig. S4 ESI-MS spectra from  $m/z$  1420 to 1520 of Long Fab incubated with cisplatin (1:20 ratio) for 12 h at 37 °C. Peaks of Long Fab- $\text{Pt}(\text{NH}_3)_2\text{Cl}^+$  adduct are shown in red.
